# Supplementary figures and images for: Genetic and Functional Differences between Duplicated Zebrafish Genes for Human SCN1A
Source: MDPI journal article supplement (doi:10.3390/cells11030454), 2022-01-28

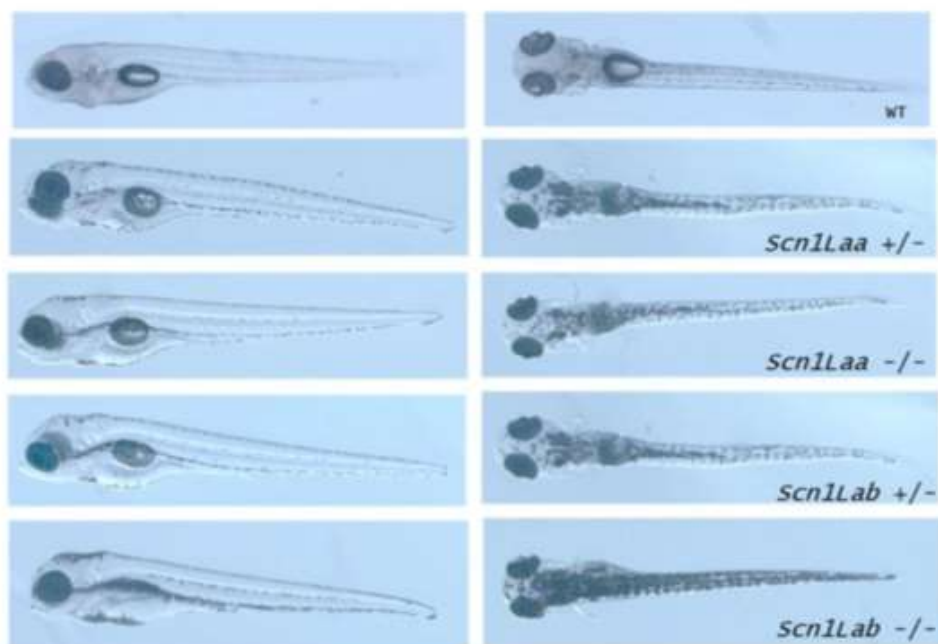

Figure S1: Morphology & strain comparison

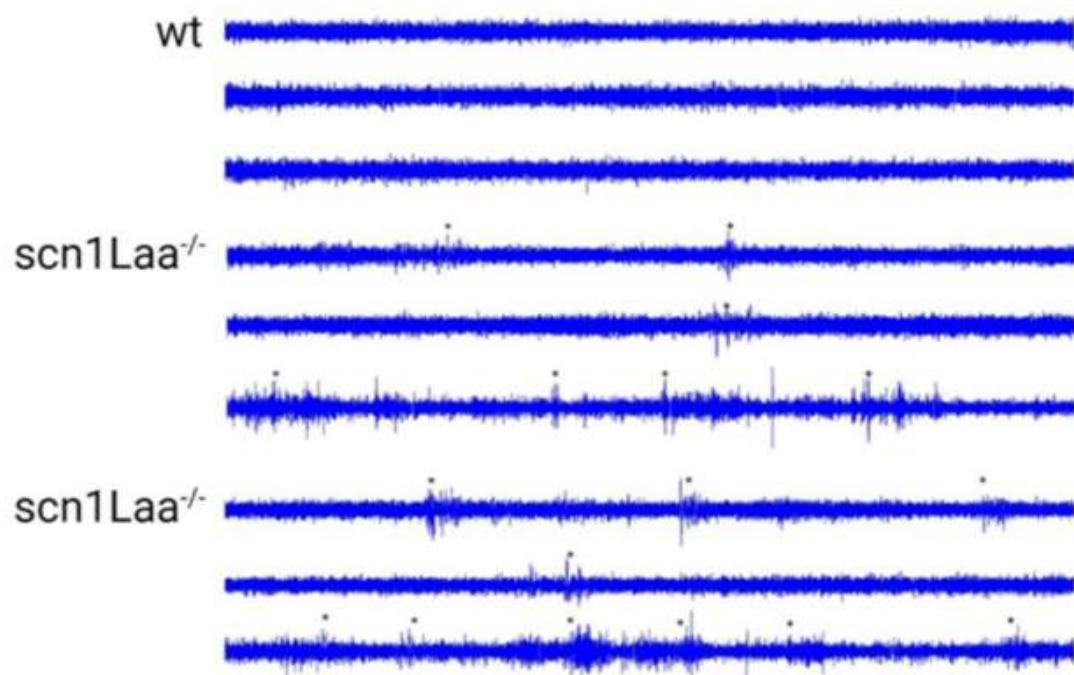

Figure S2: Full-length LFP recordings.

Supplement: s1 [file s1]
